# Supplementary material for: Study of Consumer Liking of Six Chinese Vinegar Products and the Correlation between These Likings and the Volatile Profile
Source: MDPI journal article supplement (doi:10.3390/foods11152224), 2022-07-26
Supplement: s1 [file s1]

## **Supplementary material**

### **Consumer preference of six Chinese vinegar products and the correlation between these preferences and the volatile profile**

#### **Contents:**

**Figure S1.** GC–MS total ion chromatograms of Ten-year aged Qian-he cellar vinegar (a), Ning-hua-mansion old vinegar (b), East-lake health vinegar (c), Qian-he glutinous rice vinegar (d), Heng-shun Jinyou balsamic vinegar (e), and potato vinegar (f)

**Figure S2.** Geographical distribution of respondents

**Table S1.** Coefficient of PLSR models for each cluster of consumers

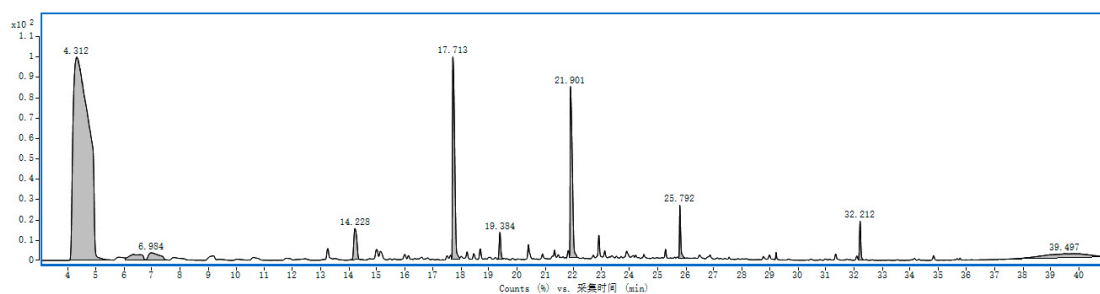

(a)

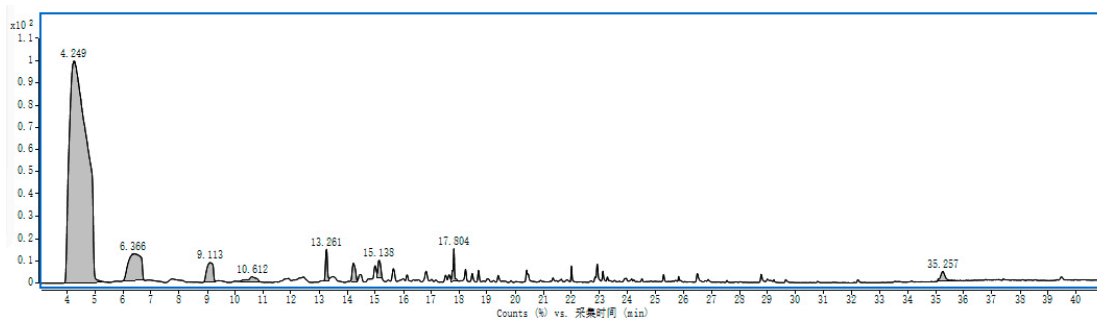

(b)

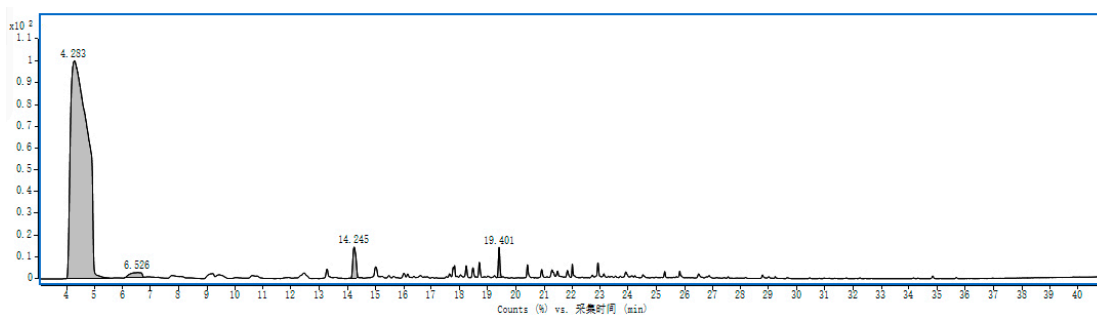

(c)

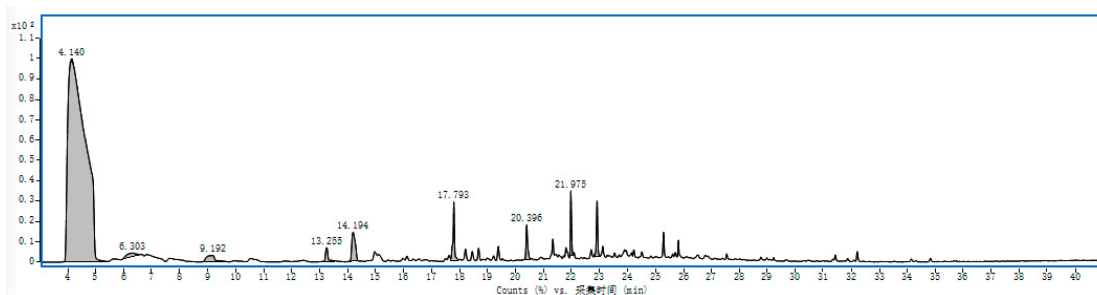

(d)

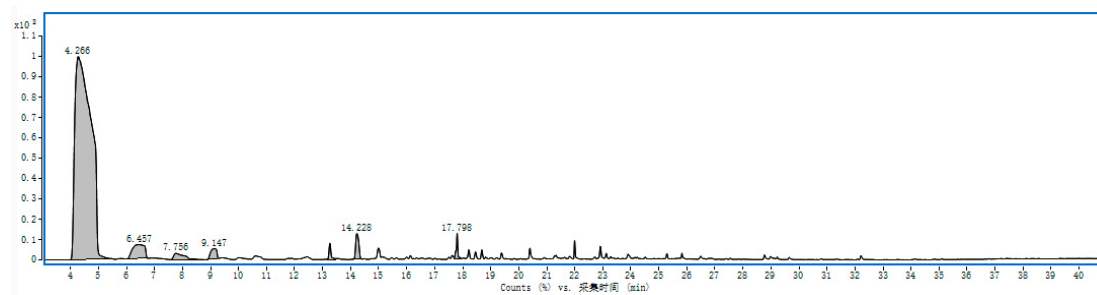

(e)

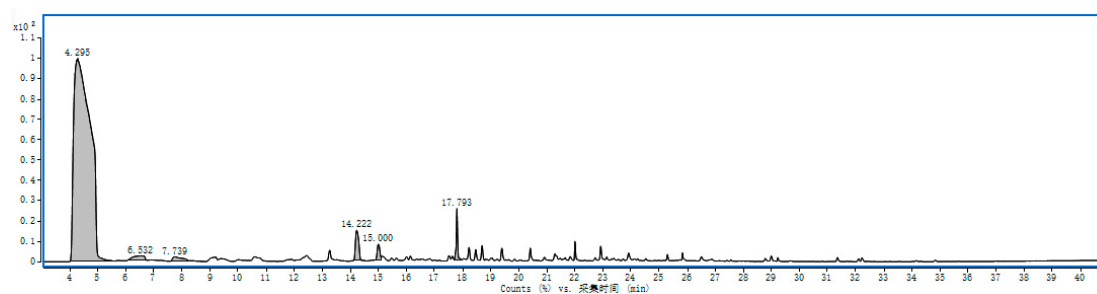

(f)

**Figure S1.** GC–MS total ion chromatograms of Ten-year aged Qian-he cellar vinegar (a), Ning-hua-mansion old vinegar (b), East-lake health vinegar (c), Qian-he glutinous rice vinegar (d), Heng-shun Jinyou balsamic vinegar (e), and potato vinegar (f)

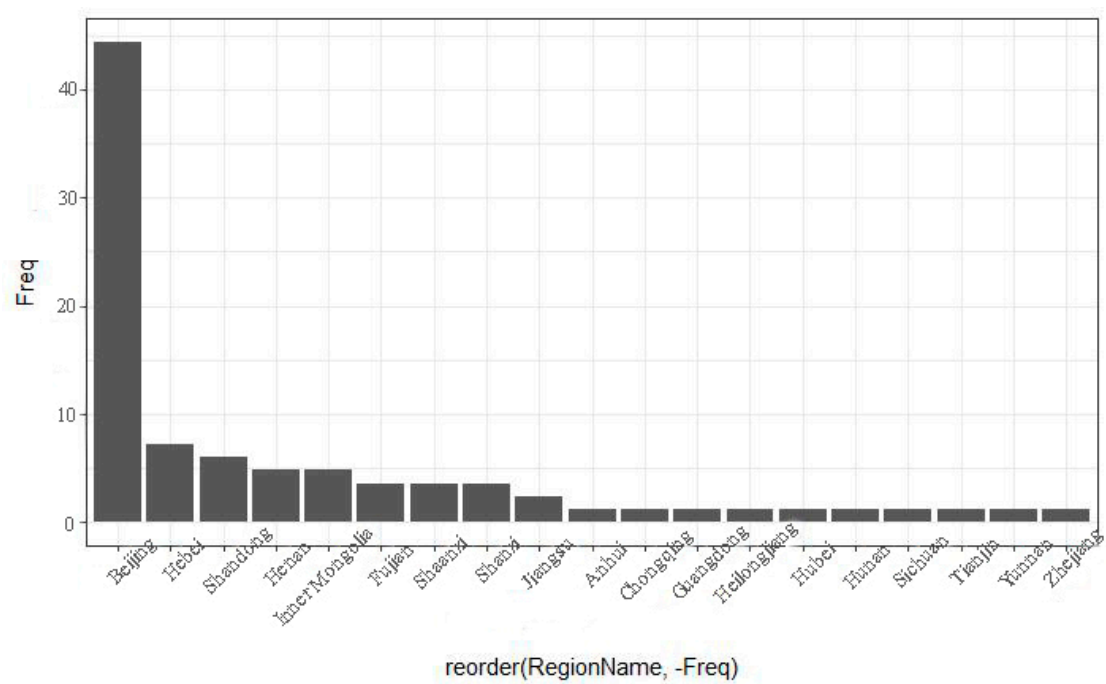

**Figure S2.** Geographical distribution of respondents

**Table S1.** Coefficient of PLSR models for each cluster of consumers

| Compounds                        | Cluster 1    | Cluster 2    | Cluster 3    |
|----------------------------------|--------------|--------------|--------------|
| (Intercept)                      | 3.456050575  | 2.900285975  | 4.191192809  |
| ethyl acetate                    | 0.052992195  | 0.041256449  | -0.070823343 |
| ethyl propionate                 | 0.033226395  | -0.038808468 | 0.021024787  |
| n-propyl acetate                 | 0.015631291  | 0.033368651  | -0.041774873 |
| isobutyl acetate                 | -0.066571488 | 0.02835015   | 0.042447526  |
| isoamyl acetate                  | -0.06560561  | 0.041076224  | 0.031000854  |
| 1,2-propanediol,2-acetate        | -0.009335841 | -0.105296627 | 0.098242768  |
| trimethylene acetate             | 0.019216632  | 0.024812648  | -0.021426136 |
| ethyl benzoate                   | -0.040300354 | 0.011777259  | 0.00356481   |
| diethyl succinate                | -0.000520397 | -0.000989915 | -0.027134602 |
| $\beta$ -phenethyl acetate       | -0.029356264 | 0.011517687  | -0.009063298 |
| 3-methylbutyraldehyde            | -0.031357201 | -0.019869663 | 0.023904848  |
| benzaldehyde                     | 0.001445659  | 0.105303412  | -0.079789235 |
| phenylethanal                    | -0.029101826 | 0.060336093  | -0.019420937 |
| 1H-pyrrole-2-carbaldehyde        | 0.049832435  | -0.032009312 | -0.016141079 |
| 1-methylpyrrole-2-carboxaldehyde | 0.056461276  | -0.0558709   | -0.00541892  |
| acetic acid                      | 0.030254114  | -0.073879974 | 0.011811463  |
| propionic acid                   | 0.000872921  | 0.033833727  | -0.014087127 |
| butyric acid                     | 0.009977118  | -0.022896813 | -0.018547984 |
| isovaleric acid                  | -0.010305801 | -0.0076494   | -0.012206123 |
| 2-methylbutyric acid             | -0.031056199 | -0.038246816 | 0.034674256  |
| caproic acid                     | 0.02837145   | -0.047412738 | -0.010856694 |
| octanoic acid                    | 0.012979257  | 0.018098937  | -0.020847446 |
| 3-methyl-1-butanol               | -0.062073097 | 0.064716415  | 0.005063059  |
| 2,3-butanediol                   | 0.023296506  | -0.018329507 | -0.017762306 |
| phenethyl alcohol                | -0.048565622 | 0.028894366  | 0.000362014  |
| 3-hydroxy-2-butanone             | 0.008852308  | 0.058896707  | -0.040114937 |
| acetophenone                     | 0.024755389  | -0.01075851  | -0.012285165 |
| 2-pyrrolidinone                  | 0.015366998  | 0.013310501  | -0.02569417  |
| guaiacol                         | 0.03433283   | -0.00821627  | -0.019156161 |
| 4-ethyl-2-methoxyphenol          | 0.009974038  | 0.043634815  | -0.033003297 |
| 4-ethylphenol                    | 0.032232916  | -0.004745407 | -0.020376677 |
| furfural                         | 0.012935676  | 0.005873907  | -0.029868392 |
| acetylfuran                      | 0.055803374  | -0.03347207  | -0.024573253 |
| furfuryl acetate                 | -0.028128301 | -0.012741882 | 0.029009408  |
| 1-pentanone, 1-(2-furanyl)-      | 0.030733207  | -0.008019582 | -0.015948382 |
| 3-furanmethanol                  | 0.018710568  | -0.045957467 | 0.020376849  |
| 1-(5-methyl-2-furyl)ethan-1-one  | 0.034481453  | -0.008259147 | -0.019263956 |
| 4-(2-furyl)-3-buten-2-one        | 0.04267412   | -0.057801153 | 0.012151728  |
| 5-acetyldihydrofuran-2(3H)-one   | 0.014780012  | 0.012897748  | -0.024650172 |

|                                |              |              |              |
|--------------------------------|--------------|--------------|--------------|
| 2,3-dimethyl pyrazine          | 0.04513335   | -0.012656225 | -0.02329515  |
| 2,3,5-trimethylpyrazine        | 0.045061374  | -0.01499961  | -0.019847758 |
| 1,3-dioxolane,2,4,5-trimethyl- | -0.016288298 | 0.05002548   | -0.049529314 |
| naphthalene                    | 0.001916086  | 0.031807084  | -0.013324674 |
| 2-methylnaphthalene            | 0.026804324  | 0.001872652  | -0.013945558 |
| 2-phenylthiophene              | 0.014762988  | -0.032287877 | 0.0133418    |
| 4-acetoxy-3-methoxystyrene     | -0.029428267 | -0.090655639 | 0.099931345  |

n = 30 for cluster 1, n = 18 for cluster 2 and n = 28 for cluster 3.
